# Supplementary material for: Observation of a chemical reaction in a levitating microdroplet cluster and droplet-generated music
Source: Royal Society of Chemistry journal article supplement (doi:10.1039/d4sc03066d), 2024-01-01
Supplement: d4sc03066d1.pdf [file d4sc03066d1.pdf]

# Sparkling drops

"Observation of a chemical reaction in a levitating microdroplet cluster and droplet-generated music"

*amoroso*

The musical score is written for piano and consists of six systems of music. Each system contains a treble clef staff and a bass clef staff. The tempo is marked *amoroso*. The key signature is one flat (B-flat major or D minor), and the time signature is 4/4. The score begins with a treble clef staff containing a whole rest, followed by a bass clef staff with a whole rest. The first system (measures 1-3) features a treble staff with a whole rest, a bass staff with a whole rest, and a final measure with a whole note chord. The second system (measures 4-6) shows a treble staff with a whole rest and a bass staff with a whole rest, followed by a treble staff with a whole rest and a bass staff with a whole rest. The third system (measures 7-9) features a treble staff with a whole rest and a bass staff with a whole rest, followed by a treble staff with a whole rest and a bass staff with a whole rest. The fourth system (measures 10-12) shows a treble staff with a whole rest and a bass staff with a whole rest, followed by a treble staff with a whole rest and a bass staff with a whole rest. The fifth system (measures 13-15) features a treble staff with a whole rest and a bass staff with a whole rest, followed by a treble staff with a whole rest and a bass staff with a whole rest. The sixth system (measures 16-18) shows a treble staff with a whole rest and a bass staff with a whole rest, followed by a treble staff with a whole rest and a bass staff with a whole rest. The score concludes with a double bar line.
